# Can Stephen Curry really know? - Conscious access to outcome prediction of motor actions

Lisa K. Maurer<sup>a,b</sup>, Heiko Maurer<sup>a</sup>, Mathias Hegele<sup>a,b</sup>, and Hermann Müller<sup>a,b</sup>

<sup>a</sup>Neuromotor Behavior Lab, Department of Psychology and Sport Science, Justus Liebig University, Giessen, Kugelberg 62, 35394 Giessen, Germany

<sup>b</sup>Center for Mind, Brain and Behavior (CMBB), Universities of Marburg and Giessen, Germany

[lisa.k.maurer@sport.uni-giessen.de](mailto:lisa.k.maurer@sport.uni-giessen.de)  
[heiko.maurer@sport.uni-giessen.de](mailto:heiko.maurer@sport.uni-giessen.de)  
[mathias.hegele@sport.uni-giessen.de](mailto:mathias.hegele@sport.uni-giessen.de)  
[hermann.mueller@sport.uni-giessen.de](mailto:hermann.mueller@sport.uni-giessen.de)

## Corresponding Author: Lisa Katharina Maurer

Department of Psychology and Sport Science  
Justus Liebig University Giessen  
Kugelberg 62, 35394 Giessen  
GERMANY

Phone: +49 (0) 641 99 25234

Fax: +49 (0) 641 99 25239

Email: [lisa.k.maurer@sport.uni-giessen.de](mailto:lisa.k.maurer@sport.uni-giessen.de)

## Abstract

The NBA player Stephen Curry has a habit of turning away from the basket right after taking three-point shots, presumably because he can predict the success of his shot. For such a consciously accessible prediction to be possible, Stephen Curry needs access to internal processes of outcome prediction and valuation. Computational simulations and empirical data suggest that the quality of internal prediction processes is related to motor expertise. Whether the results of internal predictions can reliably be consciously accessed is less clear. In the current study, 30 participants each practiced a virtual goal-oriented throwing task for 1000 trials. Every second trial, they were required to verbally predict the success of the current throw. Results showed that on average, conscious prediction accuracy was above an

individually computed chance level, taking into account individual success rates and response strategies. Furthermore, prediction accuracy was related to throwing performance. Participants with better performance predicted the success of their throws more accurately than participants with poorer performance. Moreover, for the poorer performing individuals, movement execution was negatively affected by the verbalized predictions required, and they did not show variation in speech characteristics (response latency) between correct and incorrect predictions. This indicates reduced quality of conscious access to internal processes of outcome prediction.

**Keywords:** action outcome prediction, conscious access, forward model, response latency, response amplitude

## 1 1 Introduction

2 Theories of internal models claim that the predictive outcomes of forward models play  
3 an essential role in motor learning (McNamee & Wolpert, 2019). Forward models are a  
4 set of neural processes that integrate information from the current state of the system  
5 and its environment with motor commands and sensory signals from movement  
6 execution to predict sensory consequences of that movement (Miall & Wolpert, 1996).  
7 Sensory and motor noise increase the uncertainty in the state estimate of the system.  
8 Forward models act as filters capable of reducing this uncertainty and attenuating  
9 unwanted information, or highlighting information critical for control. Furthermore,  
10 forward models can be used to transform motor errors, which are differences between  
11 desired and actual sensory outcomes of a movement into corresponding corrections in  
12 motor commands, thereby providing appropriate signals for motor learning (Wolpert et  
13 al., 1995). Based on computational simulations, it is suggested that learning is faster the  
14 better the forward model is able to model the dynamics of the movement and its effects  
15 (Jordan & Rumelhart, 1992). In line with this, empirical and anecdotal evidence confirm  
16 that processing and valuation of motor errors based on forward model predictions is  
17 strongly related to learning. First, it has been shown that neurophysiological correlates of  
18 predictive error valuation increase with learning (Beaulieu et al., 2014; Lutz et al., 2013;  
19 Maurer et al., 2021). Second, participants with extended experience in a throwing task  
20 particularly motor experts, that is throwers with high accuracy show more distinct signs  
21 of predictive error valuation on the neurophysiological level (Joch et al., 2017; Maurer et  
22 al., 2015; Maurer et al., 2021). Third, there is anecdotal evidence that motor experts are  
23 aware of their own errors and can consciously predict them even before they perceive

24 any external feedback: The alleged predictive abilities of NBA players like Stephen Curry  
25 can be observed in both professional and amateur game videos, and in them it can be  
26 observed that shortly after the ball leaves the player's hand, the players already cheer in  
27 cases of successful throws or express their disappointment in cases of missed throws.  
28 But is it really possible to gain conscious access to the predictive output of forward  
29 models in highly complex motor tasks like basketball shooting? And taken even further,  
30 might conscious access to prediction processes influence forward model computations?  
31 If so, would this influence be beneficial, as it has been shown in an apparent motion  
32 paradigm (Vetter et al., 2014), or detrimental, as proposed by the theory of reinvestment  
33 (Masters et al., 1993; Masters & Maxwell, 2008), and indicated by studies on perception-  
34 action coupling (Beilock et al., 2002; Farrow & Abernethy, 2003)? Without delving deeply  
35 into theories and models of consciousness, it has to be acknowledged that the term  
36 "consciousness" has different meanings, such as reaching from a waking state or  
37 subjectivity to an experimental variable of brain differences attributable to  
38 consciousness (Baars, 2015). In the present study "conscious access" is defined as the  
39 ability to report contents of perceptual states; according to this definition, perception  
40 itself is not limited to the processing of sensory (afferent) signals, as perception can arise  
41 from afferent and efferent information as well as cognitive (top-down) signals. Hence, if  
42 people with reliably working forward models have conscious access to the output of the  
43 forward model, they should be able to verbally predict the outcome of a motor action  
44 before any external feedback about the outcome is available. Arbuzova and colleagues  
45 (2021) examined metacognitive abilities in the discrimination of two different outcomes  
46 based on predictions in a virtual goal-oriented throwing task. Discrimination accuracy

47 was governed by an online staircase procedure aimed at fixing performance at  
48 approximately 71% correct. Results from this study do not allow conclusions about  
49 absolute discrimination accuracy (i.e., effect prediction), but, confidence about the  
50 discrimination ratings (metacognitive ability) was relatively high across different  
51 informational domains (visual, visuomotor, motor). This shows that aspects of one's own  
52 movement execution are principally available for conscious use, at least with respect to  
53 the monitoring of performance.

54 The conscious accessibility of sensorimotor prediction with respect to action outcomes  
55 has been investigated in athletes involved in different sports. The focus of most studies  
56 has been on anticipatory estimates of other players' actions, based purely on visual  
57 information, for example in basketball shooting (e.g., Abreu et al., 2012; e.g., Aglioti et  
58 al., 2008; Li & Feng, 2020; Özkan et al., 2019), volleyball smashes (e.g., Cañal-Bruland et  
59 al., 2011; Wright et al., 1990), soccer penalty kicks (Tomeo et al., 2013), or other game  
60 situations (for a review see Abreu et al., 2017). Since predictions in these studies were  
61 exclusively based on observations of motor actions, available sensorimotor information  
62 was incomplete, and visual information differed compared to when actions were  
63 executed. That is, observers lacked internal efferent information about motor  
64 commands, and did not have access to proprioceptive or haptic information associated  
65 with the related movement either. But, in contrast to performers, observers take a third-  
66 person perspective. Hence, they can use visual information from whole body kinematics.  
67 Other studies examined predictions in both observers and performers (Cañal-Bruland et  
68 al., 2015), or in performers alone (Maglott et al., 2019). Performers had to rate outcomes  
69 of basketball shots after their vision was occluded by shutter goggles immediately after

70 ball release. Results showed that, on average, performers were able to verbally predict  
71 the results of their shots above the level of chance. But, both of these studies reported a  
72 strong judgment bias regarding shooting position and outcome (hits vs. misses).  
73 Performances of shots from the foul line were generally overestimated as compared to  
74 shots taken from other distances (Canal-Bruland et al., 2015), and expert players in  
75 particular had higher biases towards predicting their shots as hits (Maglott et al., 2019).  
76 The authors took that bias into account when calculating the base rate of correct  
77 judgements (i.e., the number of all actual hits being predicted as hits plus the number of  
78 all misses being predicted as misses, relative to the total number of trials) that could be  
79 accounted for by pure chance. Yet, the base rate reflecting pure chance also depends on  
80 the actual individual hit rate, which, however, was not included in the base rate  
81 estimations provided by the authors. Furthermore, in both studies, the shutter goggles  
82 were manually controlled, which presumably introduced relatively large temporal  
83 variations of the occlusions, and it must be assumed that some post-release information  
84 about ball trajectory could have been received and processed by participants.

85 The present study aimed to verify that subjects with experience in a motor task can  
86 consciously predict outcomes of their own actions without any external feedback about  
87 action outcomes being available to them. For the experimental task, a virtual goal-  
88 oriented throwing task with parallels to basketball shooting was used. One significant  
89 advantage of studying throwing in this context is the natural delay between movement  
90 (throwing) termination and the availability of outcome feedback. Moreover, since the  
91 task was virtual and movement execution was captured online, the visual information  
92 available to subjects could be precisely controlled. Thus, outcome predictions could be

93 based exclusively on information gathered during movement planning (efferent  
94 information) and during movement execution (haptic, proprioceptive, or visual  
95 information), but not on external information about movement effects (e.g., trajectory of  
96 the object to be thrown). Hence, information on the level of an individual's accuracy in  
97 consciously accessing outcome predictions (predictive accuracy) would provide novel  
98 insight into the quality of forward models and the easiness or efficiency of conscious  
99 access to forward models. Predictive accuracy was quantified by the rate of correct  
100 verbal predictions of throwing outcome, relative to a baseline (chance) level accounting  
101 for individual hit rates and response strategies.

102 Successful verbalized predictions require at least two separate functions: a predictor and  
103 conscious access to its predictions. Or, conversely, poor predictive accuracy may arise  
104 from two reasons: (i) individuals have poor prediction quality (due to poor forward  
105 models), or (ii) they have difficult or inefficient conscious access to their forward models.  
106 Thus, it is expected that individuals with superior throwing performances (inferring good  
107 forward models) and easy conscious access to internal processes, would be able to  
108 predict their throwing outcomes above the level of chance. In the present study design,  
109 the integrated effect of both aspects was examined, and experimental separation was  
110 not directly possible. But, post-hoc interpretations of the different influences of  
111 prediction quality (i) and easiness of access (ii) on prediction accuracy are provided. As  
112 additional variables contributing to this differentiation, throwing performance and  
113 speech characteristics of verbal responses were analyzed. A possible back wash effect of  
114 conscious access to internal prediction processes results in interference with throwing  
115 performance: The preparation of conscious verbal predictions following movement

116 execution might disrupt the motor control process, and hence affect throwing  
117 performance (Beilock et al., 2002; Masters & Maxwell, 2008). These costs of conscious  
118 processing might also manifest themselves in longer verbal response latencies and lower  
119 response volumes due to hesitation (Collins et al., 2000; Seymour, 1970).

## 120 2 Materials and Methods

### 121 2.1 *Participants*

122 Thirty participants (18 female, 12 male) from the student population of the Justus Liebig  
123 University, Giessen, Germany with an average age of 24.13 ( $SD = 5.77$ ) years participated in  
124 the study. Participants were healthy and had normal or corrected-to-normal vision. Two left-  
125 handed subjects practiced the task with the right hand, which had been shown to produce  
126 similar learning curves to right-handed participants in pilot studies. Participants received  
127 course credit or monetary compensation of €8 per hour. The experiment was conducted in  
128 accordance with the ethical standards laid down in the Declaration of Helsinki. The protocol  
129 was approved by the Ethical Review Board of the Justus Liebig University, Giessen.

### 130 2.2 *Experimental task and apparatus*

131 Participants practiced a novel and complex goal-oriented throwing task that has previously  
132 been used to study motor learning (e.g., Cohen & Sternad, 2009; Maurer et al., 2021; Müller  
133 & Sternad, 2004; Pendt et al., 2011). The task is inspired by the British pub game “Skittles”,  
134 where a ball attached to the top of a post by a string has to be swung around the post to hit  
135 target objects on the opposite side. In addition to the ballistic nature of the task preventing  
136 online corrections during movement execution, this throwing task allows a temporal  
137 separation of movement execution and its terminal outcome, because the outcome is



138 temporally delayed with respect to the movement. The task was executed semi-virtually.  
139 That is, participants executed a real ballistic throwing movement using a metal lever device  
140 (manipulandum), while the movement and its outcome were only visible on a computer  
141 screen from an overhead perspective (see Fig. 1).

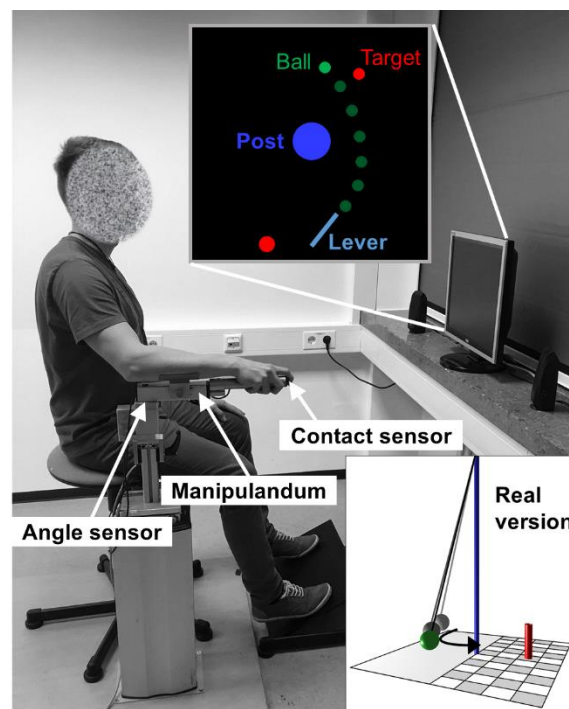

142

143 Figure 1. Experimental setup of the Skittles task. The participant uses a manipulandum  
144 to throw the virtual ball (green) with a horizontal rotational movement. The ball is  
145 released by lifting off the index finger from a contact sensor at the tip of the  
146 manipulandum. The ball travels on an elliptical pathway around the blue post to hit a  
147 red target.  
148

149 The Skittles task was carried out using MATLAB R2018a (The Mathworks, Inc.) using the  
150 Psychophysics Toolbox version 3.0.14 (Brainard, 1997). On the screen in front of each  
151 subject, a virtual equivalent of the metal lever was displayed, which participants used to pick  
152 up and throw a green virtual ball (radius on screen = 4.2 mm) around a blue center post  
153 (radius on screen = 21 mm) in order to hit a red target (radius on screen = 4.2 mm). The

154 elliptical trajectory of the ball around the center post was defined by the angle and velocity  
155 of the manipulandum at the moment of ball release. The calculation of the ball trajectory  
156 was based on a physical model of the task (Müller & Sternad, 2004) with the following  
157 parameters: center post (radius = 0.25 m; position:  $x = 0.0$  m,  $y = 0.0$  m), target (radius = 0.05  
158 m; position:  $x = 0.8$  m,  $y = 0.9$  m), ball (radius = 0.05 m; mass = 0.1 kg), spring constant (1.0  
159 N/m). In the regular version of the task, participants were able to see the ball moving  
160 towards the target after ball release. Whenever the minimum distance between the  
161 trajectory of the ball center and the center of the target ( $D_{\min}$ ) was less than or equal to  
162 twice the radius of the ball/target, the ball collided with the target (hit). For the subjects, this  
163 was apparent visually, because the target was pushed away from its position, and  
164 acoustically by the sound of two colliding billiard balls. In trials where  $D_{\min}$  was larger than  
165 twice the radius of the ball/target, the ball missed the target. In the experimental version, in  
166 every second trial the ball vanished from the screen immediately after its release from the  
167 virtual lever. In these trials, subjects did not receive any information about the movement  
168 outcome.

### 169 *2.3 Study procedure*

170 Task execution was accomplished as follows: Participants sat on a stool placed 100 cm in  
171 front of a 19-inch, 4:3 computer monitor (model: Dell P190St, screen resolution: 1280 x 1024  
172 pixels, refresh rate: 60 Hz). Their right arms rested on the foam padded manipulandum,  
173 which was fixed on a height-adjustable stand at the vertical rotation axis below the elbow  
174 joint of the participant (Figure 1). An integrated magnetic angle sensor with a resolution of  
175 12 bit (0.09 deg) measured the lever rotation with a sampling rate of 1000 Hz. Movement  
176 was restricted to the horizontal plane, more specifically, to rotation around a fixed vertical

177 axis. To pick-up the virtual ball, participants placed their index fingers on an electrical  
178 contact sensor at the tip of the lever to close an electrical circuit. They then “threw” the ball  
179 by moving the manipulandum in an outward horizontal movement similar to a Frisbee toss,  
180 and starting in front of their bodies. As soon as the participant’s finger was lifted from the  
181 manipulandum, the virtual ball was released from the virtual lever. To explain the task to the  
182 participants, a miniature model of the real Skittles game was used to clarify the task. To  
183 prevent a fast, rhythmic execution of subsequent trials, participants were instructed to start  
184 every trial by moving the tip of the virtual lever into a red circle positioned left of the fixed  
185 end of the lever (35° clockwise relative to the horizontal axis; see Figure 1). Immediately  
186 after the tip of the virtual lever reached the circle, it turned yellow. The circle turned green  
187 when the lever was held steady within the yellow circle for one second. The green starting  
188 circle signaled that participants were free to start the movement at any time. Note,  
189 however, that the subjects did not start the movement in reaction to the green signal. The  
190 aim of the task was to hit the target as frequently as possible.

191 The movement result was to be predicted verbally by the subjects within 2.5 seconds after  
192 ball release by the German words for hit (“Treffer”) or miss (“Fehler”). The verbal utterances  
193 were recorded for later analysis. For this purpose, a clip-on microphone (Monacor ECM-  
194 501L/SK), a phantom power adapter (MG STAGELINE EMA-1), and a microphone  
195 preamplifier (IMG STAGELINE MPA-202) were used. The output signal from the preamplifier  
196 was captured using a 16-bit data acquisition device (National Instruments PCIe-6321), and  
197 Matlab Data Acquisition Toolbox time synchronized with the data from the Skittles  
198 apparatus (angular and touch sensor) with a sampling frequency of 10.000 Hz.

199 **2.4 Study design**

200 Practice took place over two sessions with 500 trials each. Trials were categorized with  
201 respect to practice and experimental conditions (overview in Tab. 1). The first 100 trials of  
202 session one served as a first practice of the task. The regular version of the task was used for  
203 all of these trials. From trial 101 to trial 150, the experimental version was used where ball  
204 flight information was masked for every second trial as described above (“Experimental task  
205 and apparatus”). In these trials, participants did not receive any outcome feedback, while  
206 feedback was normally presented in the other 50 % of trials. From trial 151 to trial 1000, the  
207 regular version of the task was alternated with the experimental version in every other trial  
208 and, additionally, participants were asked to verbally predict the outcomes of their throws in  
209 the trials without ball flight information and outcome feedback (*prediction condition*). Trials  
210 151-200 served as practice of the verbal prediction. Only trials 201 to 1000 were used for  
211 analyses where the *prediction condition* (verbal prediction and no outcome feedback) was  
212 contrasted with the *regular condition* (no verbal prediction, but available outcome  
213 feedback). The alternation of throws with and without feedback was chosen because pilot  
214 data indicated that it was not possible to perform the task successfully without "drifting  
215 away" from the solution manifold of the task without regular feedback.

216 **Tab. 1. Overview of the experimental procedure**

|                            | <b>Trials 1-100</b>                         | <b>Trials 101-150</b>                              | <b>Trials 151-200</b>                              | <b>Trials 201-1000</b>                               |
|----------------------------|---------------------------------------------|----------------------------------------------------|----------------------------------------------------|------------------------------------------------------|
| <b>Experimental phases</b> | <u>Practice:</u><br>Regular task<br>version | <u>Practice:</u><br>Alternation of<br>regular task | <u>Practice:</u><br>Alternation of<br>regular task | <u>Experiment:</u><br>Alternation of<br>regular task |

|                                                                                 |                                       |                                                                                  |                                                                                                             |                                                                                                             |
|---------------------------------------------------------------------------------|---------------------------------------|----------------------------------------------------------------------------------|-------------------------------------------------------------------------------------------------------------|-------------------------------------------------------------------------------------------------------------|
|                                                                                 |                                       | version and experimental version in every trial                                  | version and prediction condition in every trial                                                             | version and prediction condition in every trial                                                             |
| <b>Implementation of feedback and verbal prediction in the different phases</b> | 100 % of trials with outcome feedback | 50 % of trials with outcome feedback and 50 % of trials without outcome feedback | 50 % of trials with outcome feedback and 50 % of trials without outcome feedback and with verbal prediction | 50 % of trials with outcome feedback and 50 % of trials without outcome feedback and with verbal prediction |

217

## 218 2.5 Analysis of throwing performance

219 Behavioral analyses as well as the analyses of verbal responses were done in MATLAB

220 R2020b (The Mathworks, Inc.). The execution variables (release angle and velocity) and

221 outcomes in the Skittles task are related in a nonlinear fashion. Furthermore, the task is

222 redundant, what means that hits and misses are not functions of a dichotomous difference

223 in throwing execution, but can arise from very different combinations in release angle and

224 velocity. As a consequence, outcome prediction is not trivial. To account for this difficulty,

225 only clear target hits (with  $D_{\min} \leq 7$  cm) and clear misses (with  $D_{\min} \geq 12$  cm) were analyzed

226 (following Joch et al., 2017; note that trials with  $D_{\min} \leq 10$  cm lead to hits). Throwing

227 performance was defined as the rate of clear hits in percent of blocks of 100 trials (10 blocks  
228 in total) averaged over all participants. Since conscious verbal predictions could influence  
229 throwing performance, hit rates between the *prediction condition* and the *regular condition*  
230 were compared. In these cases, hit rate was determined over 50 trials of each block for both  
231 conditions, because prediction trials and regular trials were alternated every trial.

## 232 2.6 Analysis of verbal responses

233 Verbal predictions of throwing outcomes were examined along two dimensions: First,  
234 prediction accuracy was analyzed in order to test whether participants were able to  
235 consciously access their internal processing of movement errors. Second, characteristics of  
236 speech, concretely variance in the onset and amplitude of verbal responses provided further  
237 information about the ease of conscious access to the predictions. It was assumed that  
238 faster (easier) conscious access would be manifested in earlier and louder prediction  
239 responses.

### 240 2.6.1 Prediction accuracy

241 Prediction accuracy was defined as the rate of correct predictions relative to an individual  
242 baseline or chance level. This was accomplished in several steps. First, the rate of correct  
243 predictions ( $\%C_{Pred}$ ) was defined as the percentage of correctly predicted clear hits and  
244 misses of all trials in the *prediction condition*. This empirical prediction rate was compared to  
245 the individually calculated prediction baselines ( $\%C_{Chance}$ ). This baseline depends on two  
246 factors: first, the rate at which participants actually hit ( $\%Act_{Hit}$ ) or missed ( $\%Act_{Miss}$ ) the  
247 target in the experimental condition and, second, the rate at which they verbally report hits  
248 ( $\%Verb_{Hit}$ ) or misses ( $\%Verb_{Miss}$ ).

249 Based on the null hypothesis that verbal estimates are unrelated to the actual occurrence of  
250 hits and misses, we estimated %C<sub>Chance</sub> in the following way:

$$251 \quad \%C_{\text{Chance}} = \%Act_{\text{Hit}} * \%Verb_{\text{Hit}} + \%Act_{\text{Miss}} * \%Verb_{\text{Miss}}$$

252 Prediction accuracy (%Acc<sub>Pred</sub>) was then computed as the percentage of correct predictions  
253 above %C<sub>Chance</sub>, normalized with respect to perfect predictions:

$$254 \quad \%Acc_{\text{Pred}} = (\%C_{\text{Pred}} - \%C_{\text{Chance}}) / (100 - \%C_{\text{Chance}})$$

255 Thus, %Acc<sub>Pred</sub> represented the ability of participants to consciously and verbally predict the  
256 outcomes of their throwing movements.

### 257 2.6.2 Speech characteristics

258 To analyze verbal utterances, voltage values from the microphone output were offset-  
259 corrected, rectified, and then a moving average calculation (window width 250 values, i.e. 25  
260 ms) was performed. The onset time of a verbal utterance was identified when the averaged  
261 profile exceeded 0.1 V. To determine the amplitudes, the maximum value in the averaged  
262 voltage curve was first determined. To account for general differences in loudness resulting  
263 from different positioning of the microphone and speaking volumes of subjects, all  
264 maximum amplitude values of each test session and subject were divided by their medians.  
265 Finally, the medians of onset latencies and response amplitudes were determined for all  
266 trials in the four different categories Act<sub>Hit</sub>/Verb<sub>Hit</sub>, Act<sub>Hit</sub>/Verb<sub>Miss</sub>, Act<sub>Miss</sub>/Verb<sub>Hit</sub>,  
267 Act<sub>Miss</sub>/Verb<sub>Miss</sub>.

## 268 2.7 Statistical analyses

269 Statistical analysis was performed in JASP (Version 0.14.1). The alpha level was set to .05 for  
270 all statistical analyses. Data normality was checked with the Shapiro-Wilk test, and sphericity  
271 was checked using the Mauchly's  $W$  test. In case of violation of sphericity, the Greenhouse-  
272 Geisser correction was used. Changes in performance were tested with repeated  
273 measurement ANOVAs over all sessions, which included *Holm* corrected post-hoc testing of  
274 single sessions. Direct comparisons of performances between the experimental conditions  
275 (*regular vs. prediction*) was done using Wilcoxon signed-rank test (due to violation of  
276 normality assumptions), using the rank-biserial correlation coefficient as effect size. A one-  
277 sample  $t$ -test was used to examine whether prediction accuracy ( $\%Acc_{Pred}$ ) was above  
278 baseline prediction, with effect sizes determined by Cohen's  $d$ . It was expected that  
279 prediction accuracy would be a function of forward-model quality, and quality of conscious  
280 access. Hence, a Spearman correlation between prediction accuracy and hit rate as well as  
281 between prediction accuracy and the differences in hit rates between the *regular condition*  
282 and the *prediction condition* (conscious processing costs) was conducted. Speech  
283 characteristics (response latency and amplitude) were tested by a 2 (actual hit or miss)  $\times$  2  
284 (verbalized hit or miss) repeated measures ANOVA, with the difference in hit rate between  
285 the *regular condition* and the *prediction condition* as a covariate. In addition, a Bayesian  
286 inference approach was used, with Bayes factors ( $BF$ ) interpreted as the amount of evidence  
287 for the null and the alternative-hypothesis before versus after inspection of the data  
288 (Verdinelli & Wasserman, 1995). The size of the  $BF$ s were interpreted according to Raftery  
289 (1995).  $BF$ s 1 - 3 were interpreted as weak evidence for the alternative hypothesis against



290 the null hypothesis, 3 - 20 as positive, 20 - 150 as strong, and  $BFs > 150$  as very strong  
291 evidence.

## 292 3 Results

### 293 3.1 Throwing performance

294 Figure 2 depicts the development of throwing performance (hit rate). Figure 2A shows the  
295 hit rate over all trials executed. In Figure 2B, only trials carried out under regular conditions  
296 are shown (from trial 201 on), and Figure 2C illustrates the hit rates of only those trials of the  
297 *prediction condition* (from trial 201 on). Hit rates started at around 50 % on average, and  
298 rose with practice until they levelled off around block seven. ANOVA analyses carried out  
299 with repeated measures showed a significant main effect of block ( $F(4.65, 134.85) = 18.92, p$   
300  $< .001, \eta_p^2 = .40, BF_{10} > 150$ ). Post hoc tests revealed significant differences between blocks  
301 1-6 and block 10, practically no differences between block 7 and 10, and no differences  
302 between blocks 8, 9 and 10 (see Tab. 2). Interindividual variance was relatively large in  
303 general (standard deviation of the hit rate of all trials was 13.49 %, see Tab. 3), and even  
304 larger in the *prediction condition* (SD = 22.71 %). The average hit rate also differed  
305 significantly between the *regular condition* and the *prediction condition* ( $W = 61, p < .001,$   
306 *rank-biserial correlation* = -0.74,  $BF_{10} > 150$ ), but-there was also large variance between  
307 participants (SD = 20.73 %, Min = -5.24 %, Max = 60.33 %).

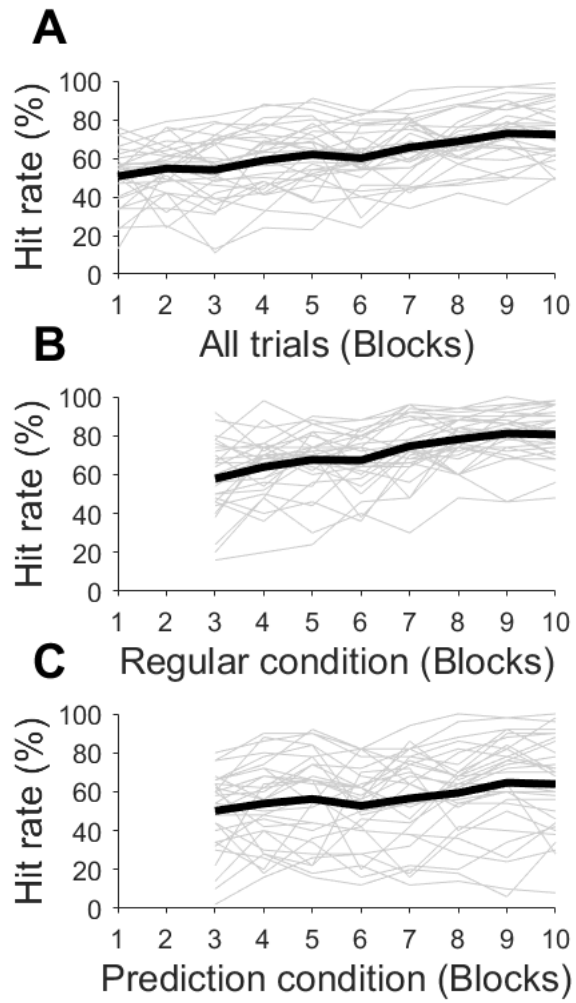

Figure 2. Development of throwing performance over all trials (A), over trials under the regular condition (B), and over trials under the prediction condition (C). Thick black lines represent the group average; thin grey lines represent individual data.

317 **Table 2. Post-hoc comparisons between blocks 1-9 and block 10.**

| Session  | Hit rate<br>Mean difference | SE   | t     | p <sub>holm</sub> | BF <sub>10</sub> |
|----------|-----------------------------|------|-------|-------------------|------------------|
| 1 vs. 10 | -0.22                       | 0.03 | -8.58 | < .001            | > 150            |
| 2 vs. 10 | -0.18                       | 0.03 | -6.98 | < .001            | > 150            |
| 3 vs. 10 | -0.19                       | 0.03 | -7.24 | < .001            | > 150            |
| 4 vs. 10 | -0.14                       | 0.03 | -5.31 | < .001            | > 150            |
| 5 vs. 10 | -0.11                       | 0.03 | -4.10 | < .001            | > 150            |
| 6 vs. 10 | -0.01                       | 0.03 | -4.85 | < .001            | > 150            |
| 7 vs. 10 | -0.13                       | 0.03 | -2.66 | .15               | 6.094            |
| 8 vs. 10 | -0.07                       | 0.03 | -1.40 | 1.00              | 1.760            |
| 9 vs. 10 | -0.04                       | 0.03 | 0.23  | 1.00              | 0.210            |

318

319 **Table 3. Descriptive data of hit rates in the two experimental conditions and both**  
 320 **conditions together (All trials)**

|                                                     | N  | Mean  | SD    |
|-----------------------------------------------------|----|-------|-------|
| Hit rate <i>All trials</i>                          | 30 | 64.28 | 13.49 |
| Hit rate <i>Regular</i>                             | 30 | 72.26 | 13.77 |
| Hit rate <i>Prediction</i>                          | 30 | 56.00 | 22.71 |
| Difference between<br><i>Prediction and Regular</i> | 30 | 16.27 | 20.73 |

321 *SD = Standard deviation*

### 322 3.2 Prediction accuracy

323 The prediction baseline was on average 55.41 % (SD = 12.83 %), which corresponds to the  
 324 average chance level for the participants' predictions. Average prediction accuracy

325 (%ACC<sub>Pred</sub>) exceeded the prediction baseline by 6.01 % (SD = 9.61 %) of the potential  
326 accuracy gain by predicting, which was significant ( $t(29) = 3.42, p = .002, d = .63, BF_{10} =$   
327 19.19). Prediction accuracy, however, varied greatly between participants (see Fig. 3). There  
328 was a significant positive correlation of %Acc<sub>Pred</sub> and hit rate over all trials ( $r = .44, p = .014,$   
329  $BF_{10} = 4.03$ ; Fig. 3A). Since throwing performance differed between the *regular condition* and  
330 the *prediction condition* with large variance between participants, it was tested whether this  
331 variance also accounted for the differences in prediction accuracies. A significant negative  
332 correlation of %Acc<sub>Pred</sub> with the difference in hit rate between the *regular condition* and the  
333 *prediction condition* was found ( $r = -0.52, p = .003, BF_{10} = 4.62$ ; see Fig. 3B). This means that  
334 participants with lower hit rates in the *prediction condition* relative to the *regular condition*  
335 showed poorer prediction accuracy, in the lowest cases even below baseline level.

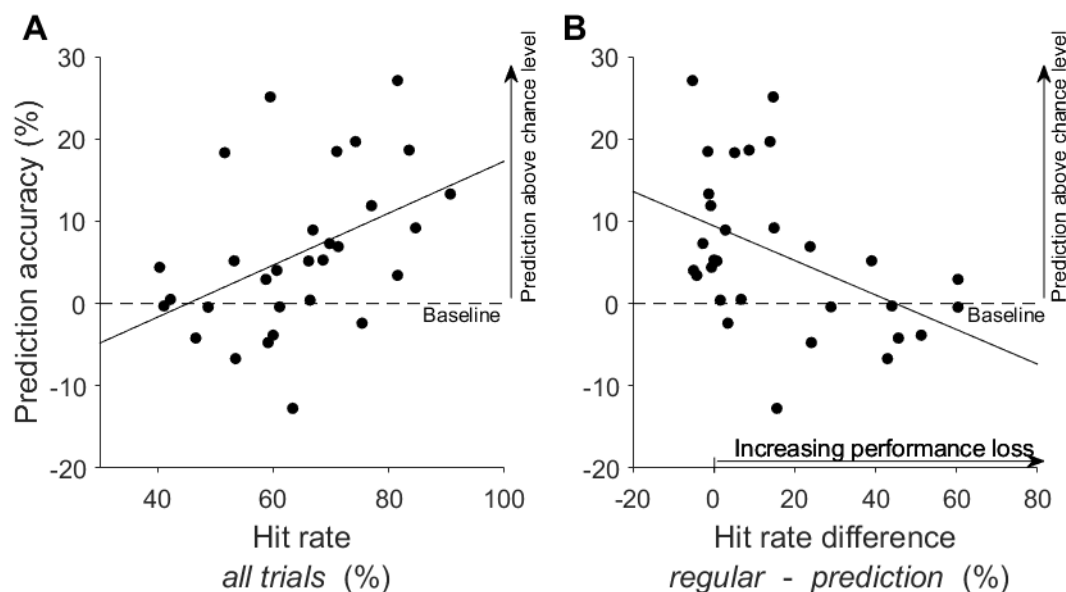

336

337 Fig. 3. Correlations of throwing performance with prediction accuracy relative to  
338 individual chance level (see 2.6 “Analysis of verbal responses”). Each dot represents  
339 the average values of a single participant. The dashed line marks the baseline  
340 prediction level (equivalent to chance level). **A:** Correlation of prediction accuracy  
341 with hit rates over all experimental trials (*prediction condition* and *regular condition*  
342 together). **B:** Correlation of prediction accuracy with the difference in hit rates

343 between the *prediction condition* and the *regular condition*. The larger the difference  
344 value, the lower the performance in the *prediction condition*.  
345

### 346 3.3 Speech characteristics

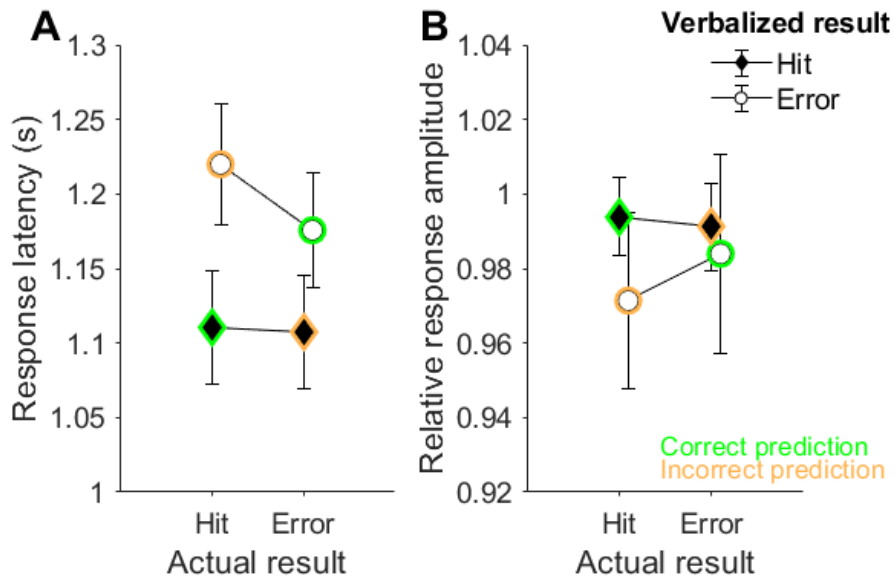

347

348 Fig. 4. Average response latencies (A) and response amplitudes (B) differentiated after  
349 actual results of trials (actual hits or misses) and the verbalized responses (verbalized  
350 hits or misses). Error bars represent standard errors of the mean. Correction  
351 predictions are marked in green, incorrect predictions are marked in orange.  
352

353 Figure 4 shows the response latencies (A) and amplitudes (B) with respect to the *verbalized*

354 *prediction as a function of actual outcome*. It can be observed that responses predicting

355 misses were generally slower, and tended to also be quieter, than responses predicting hits.

356 The latency difference was confirmed by a main effect regarding the *verbalized result* ( $F(1,$

357  $28) = 12.90, p = .001, \eta_p^2 = .32, BF_{10} > 150$ ), but there was no main effect of *verbalized result*

358 for the amplitude variable ( $F(1, 28) = 0.79, p = .38, \eta_p^2 = .03, BF_{10} = .26$ ). There was also a

359 small main effect for *actual result* in response latencies ( $F(1, 28) = 4.78, p = .037, \eta_p^2 = .15$ ),

360 which could, however, be ascribed to an interaction effect (see below). Bayesian statistics

361 confirmed that the data was not sufficiently informative to allow a strong conclusion to be

362 drawn about the main effect *actual result* ( $BF_{10} = 0.434$ ). Nevertheless, later responses of  
363 trials being incorrectly predicted as misses could clearly be observed relative to trials  
364 correctly predicted as misses, and this difference was not observable in the trials predicted  
365 as hits. Classical ANOVA revealed an interaction effect between *actual result* and *verbalized*  
366 *result* ( $F(1, 28) = 5.41, p = .028, \eta_p^2 = .16$ ). A Bayesian mixed-factor ANOVA also determined  
367 that the data were well represented by a model that included both main factors, *actual*  
368 *result* and *verbalized result*, and the *actual*  $\times$  *verbalized* interaction. The  $BF_{10}$  was 7459,  
369 indicating decisive evidence in favor of this model when compared to the null model.  
370 Moreover, the  $BF_{10}$  in favor of indicating the interaction effect on top of the main effect  
371 *actual result* was 5.82. A tendency for a similar interaction (incorrectly predicted misses  
372 seem to be expressed most quietly) could be observed in amplitude data, which was,  
373 however, neither confirmed by classical nor by Bayesian ANOVA ( $F(1, 28) = .57, p = .46, \eta_p^2 =$   
374  $.02, BF = .01$ ). There were also no interactions with the covariate *performance loss*  
375 (differences in hit rates between the *regular condition* and the *prediction condition*) in the  
376 amplitude results.

377 Regarding response latency, the three-way interaction with the covariate *actual result*  $\times$   
378 *prediction*  $\times$  *performance loss* did not achieve significance, but showed a trend for a different  
379 interaction depending on the size of performance loss ( $F(1, 28) = 5.50, p = .07, \eta_p^2 = .11$ ). In  
380 addition, the Bayes model, including the main factors *actual result* and *verbalized result* and  
381 the *performance loss* covariate, strongly outperformed the null model ( $BF_{10} > 150$ ), and  
382 weakly outperformed the model including the *actual*  $\times$  *verbalized* interaction ( $BF_{10} = 1.48$ ).  
383 To analyze how this trend was supported by the data, a median split was applied with  
384 respect to *performance loss*: one group showed virtually no performance loss ( $< 7.76\%$ ) and

385 the other showed performance loss ( $> 7.76\%$ ). Figure 5 illustrates that the interaction  
386 between *actual result* and *prediction* exists only in the group of participants who showed no  
387 performance loss in the *prediction condition*.

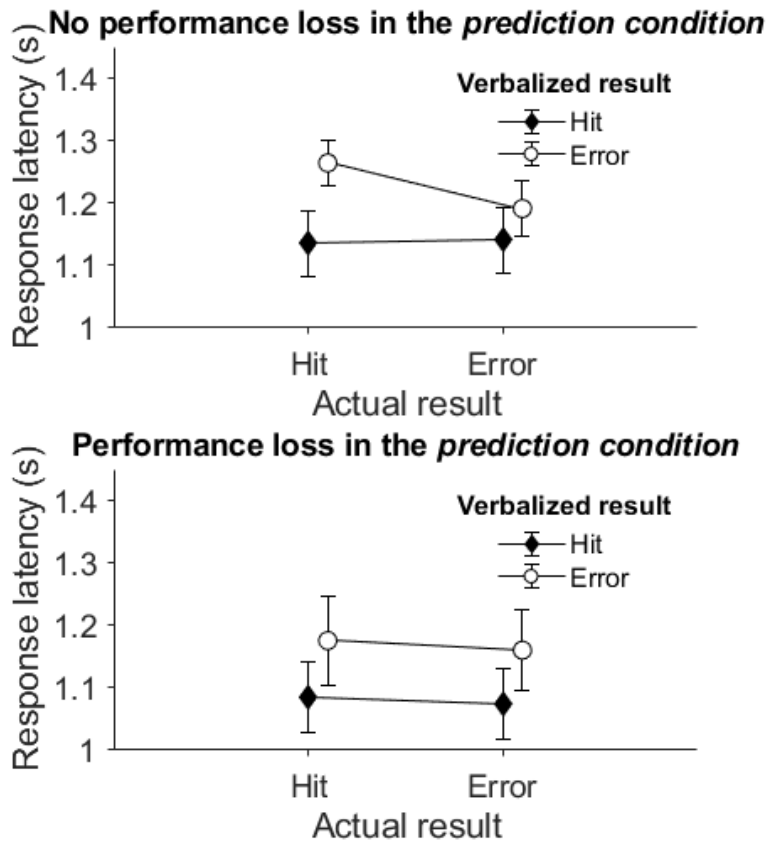

388

389 Fig. 5. Average response latencies differentiated after actual results of trials and  
390 verbalized results for two groups separated based on whether they experienced  
391 performance loss in the *prediction condition* or not. Error bars represent standard  
392 errors of the mean.

#### 393 4 Discussion

394 The present study examined whether subjects experienced in a motor task can consciously  
395 predict outcomes of their own actions without receiving any external feedback about action  
396 outcomes. To this end, participants practiced a virtual goal-oriented throwing task for 200  
397 trials. In every other of the remaining trials, they were then asked to verbally predict

398 whether the ball they had just released would hit or miss the target (*prediction condition*).  
399 They had 2.5 seconds after releasing the ball to make their predictions. No feedback was  
400 given about the trajectory of the ball. In the other half of the trials, participants did not have  
401 to predict outcomes and they could see the ball moving towards the target and hitting or  
402 missing it (*regular condition*). Results in terms of throwing performance, prediction accuracy,  
403 and speech characteristics of verbal responses were analyzed and compared between the  
404 *prediction condition* and the *regular condition*.

#### 405 **Conscious access to outcome predictions is possible, but varies interindividually**

406 On average, prediction accuracy (as the measure of conscious access to outcome  
407 predictions) exceeded baseline levels by about 6 % of the potential gain in accuracy. This  
408 means that 6 % of what, in theory, could have been achieved above chance when using  
409 internal information was achieved. 100 % in that measure would indicate predictions where  
410 every trial is correctly classified as error or hit, while 0 % represented the prediction  
411 accuracy that can be achieved without conscious access to internal prediction processes. In  
412 this case, verbalized reports of anticipated outcome predictions could only be made at the  
413 chance level. Chance level was reflected in the individual baseline level, taking into account  
414 actual hit rates (%Act<sub>Hit</sub> and %Act<sub>Miss</sub>) and verbal report rates (%Verb<sub>Hit</sub> and %Verb<sub>Miss</sub>). Thus,  
415 for accuracies above this level, any improvement in accuracy must have resulted from  
416 information gathered during the throwing movement, particularly from internal sources  
417 including correlates of efferent commands. Variance of above-baseline gains in accuracy  
418 prediction was relatively large between participants, with some individuals achieving gains  
419 of around and above 20 %, while others fluctuated around chance level. As described in the  
420 introduction, predictive accuracy is a function of prediction quality (quality of a task forward



421 model) and ease or efficiency of conscious access to the forward model predictions. So,  
422 individuals with higher prediction accuracies must have had good prediction quality and easy  
423 access to their internal processes, while the reason for poorer prediction accuracy may have  
424 been poorer prediction quality and/or more difficult access to internal processes, as quality  
425 of prediction has already been associated with experience or expertise. Forward model  
426 computations contribute to learning (Jordan & Rumelhart, 1992), and extended experience  
427 in a motor task correlates with distinct signs of predictive error processing on the  
428 neurophysiological level (Lutz et al., 2013; Beaulieu et al, 2014; Maurer et al. 2015; Joch et  
429 al., 2017; Maurer et al., 2021). Furthermore, it has been shown that motor experts (sports  
430 athletes) can anticipate the outcomes of other players' actions with relatively little  
431 information about action parameters, and that this ability rises with skill level (Abreu et al.,  
432 2012; Aglioti et al., 2008; Li & Feng, 2020; Tomeo et al., 2013). In these studies, temporal  
433 occlusion paradigms were used, where participants with varying expertise levels watched  
434 videos of motor actions and had to predict the outcomes of the actions shown at different  
435 points in time. In the Aglioti and colleagues' study (2008), professional basketball players  
436 were capable of correctly predicting shooting outcomes above the level of chance even  
437 before players on the videos released the ball. These motor experts, which professional  
438 players are, were contrasted with participants with high visual experience (sports journalists  
439 and basketball coaches). Pure visual experts needed significantly more information to  
440 correctly judge the outcomes above the level of chance. This difference indicates that motor  
441 expertise facilitates perceptual abilities in general and, more specifically, at least partially  
442 through predictive functions.

443 The present study extended these findings to predictive abilities with respect to subjects'  
444 own movement outcomes. Although experience and expertise in the task used here was not  
445 comparably high to natural experts in terms of practice trials, participants reached a learning  
446 plateau, and similar studies with the same task have shown that hit rates of more than 60 %  
447 coincided with a neurophysiological marker of forward model predictions (Maurer et al.,  
448 2015, Joch et al., 2017). In the present study, participants reached an average hit rate of  
449 over 50 % within the first 100 trials, and increased their hit rate average to 72 % in the last  
450 100 trials, taking into account both experimental conditions (*prediction* and *regular*). In the  
451 *regular condition* alone, they even reached a hit rate of over 80 %, although interindividual  
452 variance in performance was relatively high. Thus, individuals with higher hit rates could be  
453 assumed to have had a better forward model of the task and, hence, better prediction  
454 quality than individuals with lower hit rates. This was demonstrated by a positive correlation  
455 between prediction accuracy and hit rates. The second factor of prediction accuracy, ease of  
456 access, also contributed to the clarification of variances between subjects. There was a clear  
457 difference in hit rates between the *regular condition* and the *prediction condition*. Hit rates  
458 in the *regular condition* were on average higher, but there were again large differences  
459 between participants. While about half of the participants did not show much change in hit  
460 rates between the two conditions, the other half experienced large decreases in  
461 performance when throwing outcomes had to be predicted verbally. This difference in hit  
462 rates between the *regular condition* and the *prediction condition* correlated negatively with  
463 prediction accuracy. Prediction accuracy was higher when performance loss in the *prediction*  
464 *condition* was smaller. This means that the experimental demands of the *prediction*  
465 *condition* affected motor task performance more in some individuals than in others. What

466 may be the reason for this? During the experimental procedure, participants had to respond  
467 verbally no later than 2.5 seconds after releasing the ball. Hence, preparation of the  
468 response and the focus on accessing relevant internal information for the outcome  
469 prediction might have interfered with motor control processes, leading to a performance  
470 loss in the *prediction condition*. This observation is in line with well-established findings that  
471 have shown that attention to performance can become counterproductive (Masters, 1992;  
472 Masters et al., 1993). This detrimental effect is suggested to be strongest with skill-focused  
473 attention (internal focus) of step-by-step monitoring and control (Beilock et al., 2002; Beilock  
474 & Carr, 2001; Wulf et al., 1998). Conscious access of internal prediction processes, however,  
475 does not necessarily require attention to step-by-step components of a movement. The  
476 activation of this access may be more comparable to an external, goal-oriented focus of  
477 attention, which typically only affects less-skilled participants (Wulf & Su, 2007). Thus, the  
478 less-skilled participants in the present study were more impaired by the verbal prediction  
479 requirement, presumably because they had less effective access to information relevant for  
480 outcome predictions, and needed to reallocate attention from motor execution. The results  
481 from analysis of the speech characteristics of the verbal responses support this  
482 interpretation.

483 **Response latency and amplitude are related to throwing performance and prediction**  
484 **accuracy**

485 Speech production is sensitive, and hesitation and uncertainty of responses can be observed  
486 in measures of response latency and amplitude (Seymour, 1970; Collins et al., 2000). Hence,  
487 possible detrimental effects of conscious access to movement outcome predictions may be  
488 represented by these variables. Movement outcome predictions are based on different

489 sources of information gathered during movement planning (efference copy) and movement  
490 execution (haptic, proprioceptive, or visual information; Wolpert et al., 1995), with each of  
491 these modalities producing different time delays and resulting in varying degrees of accuracy  
492 (Cameron et al., 2014; Pasma et al., 2015; Thorpe et al., 1996). It can be assumed that  
493 outcome estimates are continuously produced, resulting in an increase in accuracy of the  
494 input information while the movement is evolving. Hence, responses can be quick if  
495 sufficiently accurate information is available early on, or if predictions are, instead, based on  
496 experience, or are “thoughtlessly” uttered without the subject’s consideration of the actual  
497 input information when making predictions.

498 In the present study, there was a general observation of quicker (and in tendency also  
499 louder) responses when a hit was predicted, irrespective of whether this turned out to be  
500 true or not. In contrast, response latency differed between correctly and incorrectly  
501 predicted misses: Predictions of trials that were incorrectly predicted as misses were  
502 verbalized more slowly than predictions of trials correctly verbalized as misses. This  
503 difference was only observable in participants without performance loss in the *prediction*  
504 *condition*. Moreover, correctly predicted hits and correctly predicted misses had similar  
505 response latencies (and amplitudes), especially in the “no performance loss” group. Hence,  
506 in these cases, input information was probably clear and accurate relatively early, leading to  
507 relatively fast outcome estimates. In contrast, incorrectly predicted misses resulted in slower  
508 response latencies. This indicates that the information gathered here was more ambiguous  
509 for outcome predictions, and that this ambiguity did not resolve over time. Nevertheless,  
510 participants waited longer, apparently hoping for better information resolution, and ended  
511 up answering incorrectly. That this effect was not observed in the “performance loss” group

512 indicates limited access to internal prediction processes in these participants. They were  
513 apparently not able to differentiate between accurate and ambiguous input information  
514 and, hence, showed similar response times between correctly and incorrectly predicted  
515 trials. As already described, the latency effect was generally not present in incorrectly  
516 predicted hit trials. The reason for the difference between hit and miss predictions could be  
517 a general bias toward hit responses, as has been observed in other studies (Canal-Bruland et  
518 al., 2015; Maglott et al., 2019). Response bias in the computation of prediction accuracy was  
519 controlled for, but it may have still been inherent in verbal responses. Hence, it is possible  
520 that responses predicting hits were expressed based on experiences instead of waiting for  
521 accurate input information, which led participants to respond (too) early. However, further  
522 experiments would be needed to confirm this assumption.

523 Taking together results of prediction accuracy, throwing performance, and speech  
524 characteristics of verbal responses, it can be concluded that task expertise allows rapid  
525 access to accurate motor predictions without interference with motor control processes. On  
526 the contrary, when throwing performance is poor, conscious access to internal predictions  
527 negatively affects movement execution, presumably in the form of conscious processing  
528 costs. In light of these results, the question posed in the title can be answered in the  
529 affirmative: Yes, he can! Given the fact that Stephen Curry has exceptionally good throwing  
530 skills, it can be assumed that he has an excellent forward model and good access to internal  
531 predictions.

## 532 **Limitations**

533 There are limitations in this study that need to be taken into consideration when  
534 interpreting results. First, no neurophysiological measures were recorded, which could have  
535 provided more direct information about internal prediction processes. Temporal  
536 characteristics of error-related potentials in electroencephalogram measures, such as the  
537 error-related negativity (Falkenstein et al., 1991; Gehring et al., 1993) could have supported  
538 interpretations about the response latency effects. In addition, there might be another  
539 explanation for the variances in prediction accuracy aside from conscious processing costs  
540 that cannot be fully ruled out. In the prediction condition, participants had no visual  
541 feedback about throwing effects (i.e., the ball was masked as soon as it was released).  
542 Although feedback in the form of information about ball trajectory could not have had any  
543 influence on performance in the current trial (since the throwing movement was already  
544 terminated at that point), such feedback might have affected the participants anticipatively.  
545 That is, knowing that a trial would be without feedback could have unsettled and blocked  
546 them. This explanation is regarded as not very likely, but only an experimental separation of  
547 missing visual feedback information about action outcomes from conscious processing costs  
548 can provide a clear differentiation.

## 549 5 Acknowledgments

550 This research was funded by the Deutsche Forschungsgemeinschaft (DFG, German Research  
551 Foundation) – project number 222641018 – SFB/TRR 135 TP B6.

## 552 6 Literaturverzeichnis

553 Abreu, A. M., Candidi, M. & Aglioti, S. M. (2017). Catching on it early: Bodily and brain

554 anticipatory mechanisms for excellence in sport. *Progress in brain research*, 234, 53–67.

555 <https://doi.org/10.1016/bs.pbr.2017.08.006>

556 Abreu, A. M., Macaluso, E., Azevedo, R. T., Cesari, P., Urgesi, C. & Aglioti, S. M. (2012). Action

557 anticipation beyond the action observation network: a functional magnetic resonance

558 imaging study in expert basketball players. *European Journal of Neuroscience*, 35(10),

559 1646–1654. <https://doi.org/10.1111/j.1460-9568.2012.08104.x>

560 Aglioti, S. M., Cesari, P., Romani, M. & Urgesi, C. (2008). Action anticipation and motor

561 resonance in elite basketball players. *Nat Neurosci*, 11(9), 1109–1116.

562 <https://doi.org/10.1038/nn.2182>

563 Arbuzova, P., Peters, C., Röd, L., Koß, C., Maurer, H., Maurer, L., Müller, H., Verrel, J. &

564 Filevich, E. (in press). Measuring metacognition of direct and indirect parameters of

565 voluntary movement. *Journal of Experimental Psychology: General*.

566 Baars, B. (2015). Consciousness. *Scholarpedia*, 10(8), 2207.

567 <https://doi.org/10.4249/scholarpedia.2207>

568 Beaulieu, C., Bourassa, M.-È., Brisson, B., Jolicoeur, P. & Beaumont, L. de (2014).

569 Electrophysiological correlates of motor sequence learning. *BMC Neuroscience*, 15, 102.

570 <https://doi.org/10.1186/1471-2202-15-102>

571 Beilock, S. & Carr, T. (2001). On the fragility of skilled performance: What governs choking

572 under pressure? *Journal of Experimental Psychology: General*, 130(4), 701–725.

- 573 Beilock, S., Carr, T., MacMahon, C. & Starkes, J. (2002). When paying attention becomes  
574 counterproductive: Impact of divided versus skill-focused attention on novice and  
575 experienced performance of sensorimotor skills. *Journal of Experimental Psychology:*  
576 *Applied*, 8(1), 6–16.
- 577 Brainard, D. H. (1997). The Psychophysics Toolbox. *Spatial Vision*, 10(4), 433–436.
- 578 Cameron, B. D., La Malla, C. de & López-Moliner, J. (2014). The role of differential delays in  
579 integrating transient visual and proprioceptive information. *Frontiers in Psychology*, 5, 50.  
580 <https://doi.org/10.3389/fpsyg.2014.00050>
- 581 Cañal-Bruland, R., Balch, L. & Niesert, L. (2015). Judgement bias in predicting the success of  
582 one's own basketball free throws but not those of others. *Psychological Research*, 79(4),  
583 548–555. <https://doi.org/10.1007/s00426-014-0592-2>
- 584 Cañal-Bruland, R., Mooren, M. & Savelsbergh, G. J. P. (2011). Differentiating experts'  
585 anticipatory skills in beach volleyball. *Research Quarterly for Exercise and Sport*, 82(4),  
586 667–674. <https://doi.org/10.1080/02701367.2011.10599803>
- 587 Cohen, R. & Sternad, D. (2009). Variability in motor learning: relocating, channeling and  
588 reducing noise. *Experimental Brain Research*, 193(1), 69–83.  
589 <https://doi.org/10.1007/s00221-008-1596-1>
- 590 Collins, L. H., Powell, J. L. & Oliver, P. V. (2000). Those who hesitate lose: the relationship  
591 between assertiveness and response latency. *Perceptual and Motor Skills*, 90(3 Pt 1), 931–  
592 943. <https://doi.org/10.2466/pms.2000.90.3.931>
- 593 Falkenstein, M., Hohnsbein, J., Hoormann, J. & Blanke, L. (1991). Effects of crossmodal  
594 divided attention on late ERP components. II. Error processing in choice reaction tasks.



- 595 *Electroencephalography and Clinical Neurophysiology*, 78(6), 447–455.
- 596 [https://doi.org/10.1016/0013-4694\(91\)90062-9](https://doi.org/10.1016/0013-4694(91)90062-9)
- 597 Farrow, D. & Abernethy, B. (2003). Do expertise and the degree of perception-action  
598 coupling affect natural anticipatory performance? *Perception*, 32(9), 1127–1139.  
599 <https://doi.org/10.1068/p3323>
- 600 Gehring, W. J., Goss, B., Coles, M. G. H., Meyer, D. E. & Donchin, E. (1993). A Neural System  
601 for Error Detection and Compensation. *Psychological Science*, 4(6), 385–390.  
602 <https://doi.org/10.1111/j.1467-9280.1993.tb00586.x>
- 603 Joch, M., Hegele, M., Maurer, H., Müller, H. & Maurer, L. K. (2017). Brain negativity as an  
604 indicator of predictive error processing: the contribution of visual action effect  
605 monitoring. *Journal of Neurophysiology*, 118(1), 486–495.  
606 <https://doi.org/10.1152/jn.00036.2017>
- 607 Jordan, M. & Rumelhart, D. (1992). Forward models: Supervised learning with a distal  
608 teacher. *Cognitive Science*, 16(3), 307–354. [https://doi.org/10.1016/0364-0213\(92\)90036-](https://doi.org/10.1016/0364-0213(92)90036-)  
609 T
- 610 Li, Y. & Feng, T. (2020). The effects of sport expertise and shot results on basketball players'  
611 action anticipation. *PLoS ONE*, 15(1), e0227521.  
612 <https://doi.org/10.1371/journal.pone.0227521>
- 613 Lutz, K., Puorger, R., Cheetham, M. & Jancke, L. (2013). Development of ERN together with  
614 an internal model of audio-motor associations. *Frontiers in Human Neuroscience*, 7, 471.  
615 <https://doi.org/10.3389/fnhum.2013.00471>

- 616 Maglott, J. C., Chiasson, D. & Shull, P. B. (2019). Influence of skill level on predicting the  
617 success of one's own basketball free throws. *PLoS ONE*, *14*(3), e0214074.  
618 <https://doi.org/10.1371/journal.pone.0214074>
- 619 Masters, R. (1992). Knowledge, knerves and know-how: The role of explicit versus implicit  
620 knowledge in the breakdown of a complex motor skill under pressure. *British Journal of*  
621 *Psychology*, *83*, 343–358.
- 622 Masters, R. & Maxwell, J. (2008). The theory of reinvestment. *International Review of Sport*  
623 *and Exercise Psychology*, *1*(2), 160–183. <https://doi.org/10.1080/17509840802287218>
- 624 Masters, R., Polman, R. & Hammond, N. V. (1993). ‘Reinvestment’: A dimension of  
625 personality implicated in skill breakdown under pressure. *Personality and Individual*  
626 *Differences*, *14*(5), 655–666. [https://doi.org/10.1016/0191-8869\(93\)90113-H](https://doi.org/10.1016/0191-8869(93)90113-H)
- 627 Maurer, L. K., Joch, M., Hegele, M., Maurer, H. & Müller, H. (2021). Relevance of predictive  
628 and postdictive error information in the course of motor learning. *Manuscript under*  
629 *revision*.
- 630 Maurer, L. K., Maurer, H. & Müller, H. (2015). Neural correlates of error prediction in a  
631 complex motor task. *Frontiers in behavioral neuroscience*, *9*, 209.  
632 <https://doi.org/10.3389/fnbeh.2015.00209>
- 633 McNamee, D. & Wolpert, D. M. (2019). Internal Models in Biological Control. *Annual review*  
634 *of control, robotics, and autonomous systems*, *2*, 339–364.  
635 <https://doi.org/10.1146/annurev-control-060117-105206>
- 636 Miall, R. C. & Wolpert, D. M. (1996). Forward Models for Physiological Motor Control. *Neural*  
637 *Networks*, *9*(8), 1265–1279. [https://doi.org/10.1016/s0893-6080\(96\)00035-4](https://doi.org/10.1016/s0893-6080(96)00035-4)

- 638 Müller, H. & Sternad, D. (2004). Accuracy and variability in goal-oriented movements:  
639 Decomposition of gender differences in children. *Journal of Human Kinetics*, 12, 31–50.
- 640 Özkan, D. G., Pezzetta, R., Moreau, Q., Abreu, A. M. & Aglioti, S. M. (2019). Predicting the  
641 fate of basketball throws: an EEG study on expert action prediction in wheelchair  
642 basketball players. *Experimental Brain Research*, 237(12), 3363–3373.  
643 <https://doi.org/10.1007/s00221-019-05677-x>
- 644 Pasma, J. H., Engelhart, D., Maier, A. B., Schouten, A. C., van der Kooij, H. & Meskers, C. G. M.  
645 (2015). Changes in sensory reweighting of proprioceptive information during standing  
646 balance with age and disease. *Journal of Neurophysiology*, 114(6), 3220–3233.  
647 <https://doi.org/10.1152/jn.00414.2015>
- 648 Pendt, L. K., Reuter, I. & Müller, H. (2011). Motor skill learning, retention, and control deficits  
649 in Parkinson's disease. *PLoS ONE*, 6(7), e21669.  
650 <https://doi.org/10.1371/journal.pone.0021669>
- 651 Raftery, A. E. (1995). Bayesian Model Selection in Social Research. *Sociological Methodology*,  
652 25, 111. <https://doi.org/10.2307/271063>
- 653 Seymour, P. H. (1970). Conceptual uncertainty and the latency of judgements of the  
654 congruence of word-shape pairs. *Acta Psychologica*, 34, 451–461.  
655 [https://doi.org/10.1016/0001-6918\(70\)90038-7](https://doi.org/10.1016/0001-6918(70)90038-7)
- 656 Thorpe, S., Fize, D. & Marlot, C. (1996). Speed of processing in the human visual system.  
657 *Nature*, 381(6582), 520–522. <https://doi.org/10.1038/381520a0>

- 658 Tomeo, E., Cesari, P., Aglioti, S. M. & Urgesi, C. (2013). Fooling the kickers but not the  
659 goalkeepers: behavioral and neurophysiological correlates of fake action detection in  
660 soccer. *Cereb Cortex*, 23(11), 2765–2778. <https://doi.org/10.1093/cercor/bhs279>
- 661 Verdinelli, I. & Wasserman, L. (1995). Computing Bayes Factors Using a Generalization of the  
662 Savage-Dickey Density Ratio. *Journal of the American Statistical Association*, 90(430), 614.  
663 <https://doi.org/10.2307/2291073>
- 664 Vetter, P., Sanders, L. L. O. & Muckli, L. (2014). Dissociation of prediction from conscious  
665 perception. *Perception*, 43(10), 1107–1113. <https://doi.org/10.1068/p7766>
- 666 Wolpert, D. M., Ghahramani, Z. & Jordan, M. I. (1995). An internal model for sensorimotor  
667 integration. *Science*, 269(5232), 1880–1882.
- 668 Wright, D. L., Pleasants, F. & Gomez-Meza, M. (1990). Use of Advanced Visual Cue Sources in  
669 Volleyball. *Journal of Sport & Exercise Psychology*, 12(4), 406–414.  
670 <https://doi.org/10.1123/jsep.12.4.406>
- 671 Wulf, G., Höß, M. & Prinz, W. (1998). Instructions for motor learning: Differential effects of  
672 internal versus external focus of attention. *Journal of Motor Behavior*, 30(2), 169–179.
- 673 Wulf, G. & Su, J. (2007). An external focus of attention enhances golf shot accuracy in  
674 beginners and experts. *Research Quarterly for Exercise and Sport*, 78, 384–389.
- 675
